# Supplementary material for: Engineering TATA-binding protein Spt15 to improve ethanol tolerance and production in Kluyveromyces marxianus
Source: Biotechnol Biofuels. 2018 Jul 24;11:207. doi: 10.1186/s13068-018-1206-9 (PMC6058363; doi:10.1186/s13068-018-1206-9)
Supplement: Supplementary file 3 — Additional file 3. RPKM values and fold changes of genes in the central carbon metabolic network. [file 13068_2018_1206_MOESM3_ESM.xlsx]

## Sheet: Sheet1
RefSeq mRNA Accession	Gene Info	RPKM						Fold change	P value
		SPT15_1	SPT15_2	SPT15_3	M2_1	M2_2	M2_3
XM_022818815.1	34715589 [Gene Symbol: ACO2b] [Locus Tag: KLMA_30312] [Chromosome: 3] [Map Location: ] [Description: aconitate hydratase] [Gene Type: protein-coding]	42.0022	41.0313	43.4399	72.4885	73.7553	63.4904	1.65833	0.0138955
XM_022820536.1	34717132 [Gene Symbol: ACS2] [Locus Tag: KLMA_50533] [Chromosome: 5] [Map Location: ] [Description: acetyl-coenzyme A synthetase 2] [Gene Type: protein-coding]	136.283	121.881	105.325	130.47	159.603	106.247	1.09032	0.582765
XM_022819382.1	34716095 [Gene Symbol: ADH1] [Locus Tag: KLMA_40102] [Chromosome: 4] [Map Location: ] [Description: alcohol dehydrogenase 1] [Gene Type: protein-coding]	1070.53	1162.11	1327.73	928.532	1215.99	1186.14	0.935482	0.552695
XM_022819509.1	34716208 [Gene Symbol: ADH2] [Locus Tag: KLMA_40220] [Chromosome: 4] [Map Location: ] [Description: alcohol dehydrogenase 2] [Gene Type: protein-coding]	1835.06	2061.39	2794.19	2912.19	3412.66	2584.03	1.33154	0.121086
XM_022822056.1	34718498 [Gene Symbol: ADH3] [Locus Tag: KLMA_80306] [Chromosome: 8] [Map Location: ] [Description: alcohol dehydrogenase 3] [Gene Type: protein-coding]	15.5005	17.9654	17.0804	26.2488	37.2136	21.3576	1.67807	0.137643
XM_022822699.1	34714639 [Gene Symbol: ADH4b] [Locus Tag: KLMA_20158] [Chromosome: 2] [Map Location: ] [Description: alcohol dehydrogenase 4] [Gene Type: protein-coding]	24.3392	27.4868	26.5581	55.7028	63.1979	47.5655	2.12372	0.0237722
XM_022819977.1	34716630 [Gene Symbol: ALD4] [Locus Tag: KLMA_50012] [Chromosome: 5] [Map Location: ] [Description: potassium-activated aldehyde dehydrogenase] [Gene Type: protein-coding]	7.64815	6.53372	3.08513	9.0111	6.43442	3.3707	1.08972	0.820501
XM_022822431.1	34714396 [Gene Symbol: ALD6] [Locus Tag: KLMA_10742] [Chromosome: 1] [Map Location: ] [Description: magnesium-activated aldehyde dehydrogenase] [Gene Type: protein-coding]	4574.68	5043.45	6593.49	10534.6	10399	8635.99	1.82397	0.00672111
XM_022822644.1	34714589 [Gene Symbol: CIT1] [Locus Tag: KLMA_20105] [Chromosome: 2] [Map Location: ] [Description: citrate synthase] [Gene Type: protein-coding]	604.256	694.555	864.715	1567.23	1821.43	1647.2	2.32762	0.000864676
XM_022821596.1	34714125 [Gene Symbol: ENO] [Locus Tag: KLMA_10462] [Chromosome: 1] [Map Location: ] [Description: enolase] [Gene Type: protein-coding]	2510.7	2642.96	3317.21	873.715	1097.73	952.791	0.345211	0.0189499
XM_022819692.1	34716374 [Gene Symbol: FBA1] [Locus Tag: KLMA_40388] [Chromosome: 4] [Map Location: ] [Description: fructose-bisphosphate aldolase] [Gene Type: protein-coding]	884.857	947.455	1106.84	778.706	840.156	630.982	0.765473	0.064365
XM_022821129.1	34717666 [Gene Symbol: FBP1] [Locus Tag: KLMA_60452] [Chromosome: 6] [Map Location: ] [Description: fructose-1,6-bisphosphatase] [Gene Type: protein-coding]	10.2077	10.9004	7.32017	5.72702	7.15647	6.81626	0.692965	0.0900861
XM_022821757.1	34718229 [Gene Symbol: FUM1] [Locus Tag: KLMA_80028] [Chromosome: 8] [Map Location: ] [Description: fumarate hydratase] [Gene Type: protein-coding]	90.185	77.3669	76.7508	51.7167	69.743	49.2423	0.698732	0.0347359
XM_022819508.1	34716207 [Gene Symbol: GAP1] [Locus Tag: KLMA_40218] [Chromosome: 4] [Map Location: ] [Description: glyceraldehyde-3-phosphate dehydrogenase 1] [Gene Type: protein-coding]	883.132	1064.61	1409.88	4005.39	3698.62	3163.64	3.23671	0.00328434
XM_022821790.1	34718259 [Gene Symbol: GAP3] [Locus Tag: KLMA_80059] [Chromosome: 8] [Map Location: ] [Description: glyceraldehyde-3-phosphate dehydrogenase 3] [Gene Type: protein-coding]	1002.49	1090.43	1465.89	666.911	868.019	610.43	0.602832	0.0622408
XM_022822193.1	34713735 [Gene Symbol: GLK1] [Locus Tag: KLMA_10051] [Chromosome: 1] [Map Location: ] [Description: glucokinase-1] [Gene Type: protein-coding]	156.684	160.978	143.67	108.394	88.4986	111.836	0.669211	0.00471805
XM_022818640.1	34713860 [Gene Symbol: GPD1] [Locus Tag: KLMA_10179] [Chromosome: 1] [Map Location: ] [Description: glycerol-3-phosphate dehydrogenase [NAD+] 1] [Gene Type: protein-coding]	1199.75	1268.56	1561.86	2099.69	2315.3	1684.67	1.5135	0.0494649
XM_022817905.1	34714771 [Gene Symbol: GPD2] [Locus Tag: KLMA_20296] [Chromosome: 2] [Map Location: ] [Description: glyceraldehyde-3-phosphate dehydrogenase 2] [Gene Type: protein-coding]	7.45534	7.96126	5.41323	7.05851	6.1154	8.06495	1.01964	0.894029
XM_022822635.1	34714582 [Gene Symbol: GPM1] [Locus Tag: KLMA_20098] [Chromosome: 2] [Map Location: ] [Description: phosphoglycerate mutase 1] [Gene Type: protein-coding]	375.524	381.678	468.939	732.474	836.475	599.371	1.76841	0.0247887
XM_022818673.1	34713863 [Gene Symbol: GPM3] [Locus Tag: KLMA_10182] [Chromosome: 1] [Map Location: ] [Description: phosphoglycerate mutase 3] [Gene Type: protein-coding]	275.859	257.572	235.228	162.743	135.867	158.844	0.595132	0.00198564
XM_022819783.1	34716456 [Gene Symbol: IDP1] [Locus Tag: KLMA_40470] [Chromosome: 4] [Map Location: ] [Description: isocitrate dehydrogenase [NADP]] [Gene Type: protein-coding]	61.5872	46.5984	34.2062	24.6129	13.2788	20.4593	0.409793	0.04696
XM_022821223.1	34717750 [Gene Symbol: KGD1] [Locus Tag: KLMA_60541] [Chromosome: 6] [Map Location: ] [Description: 2-oxoglutarate dehydrogenase E1 component] [Gene Type: protein-coding]	138.748	132.087	131.338	33.4011	38.1603	42.6129	0.283894	1.11497e-05
XM_022821210.1	34717738 [Gene Symbol: LAT1] [Locus Tag: KLMA_60529] [Chromosome: 6] [Map Location: ] [Description: dihydrolipoyllysine-residue acetyltransferase component of pyruvate dehydrogenase complex] [Gene Type: protein-coding]	174.025	172.17	161.273	108.764	93.2991	113.13	0.621111	0.003005
XM_022820252.1	34714005 [Gene Symbol: LSC2] [Locus Tag: KLMA_10336] [Chromosome: 1] [Map Location: ] [Description: succinyl-CoA ligase [ADP-forming] subunit beta] [Gene Type: protein-coding]	375.279	405.093	454.459	526.113	596.28	650.358	1.43562	0.0247043
XM_022820827.1	34717394 [Gene Symbol: MDH1] [Locus Tag: KLMA_60167] [Chromosome: 6] [Map Location: ] [Description: malate dehydrogenase] [Gene Type: protein-coding]	338.976	325.927	374.343	303.774	315.07	333.121	0.916016	0.181734
XM_022819697.1	34716377 [Gene Symbol: MDH2] [Locus Tag: KLMA_40391] [Chromosome: 4] [Map Location: ] [Description: malate dehydrogenase] [Gene Type: protein-coding]	620.143	694.626	903.276	1420.1	1367.69	1200.3	1.79802	0.00538294
XM_022819330.1	34716050 [Gene Symbol: MDH3] [Locus Tag: KLMA_40055] [Chromosome: 4] [Map Location: ] [Description: malate dehydrogenase] [Gene Type: protein-coding]	143.088	139.174	125.098	61.9442	63.9058	66.5299	0.47226	0.0060982
XM_022820726.1	34717303 [Gene Symbol: PDC1] [Locus Tag: KLMA_60075] [Chromosome: 6] [Map Location: ] [Description: pyruvate decarboxylase] [Gene Type: protein-coding]	7278.89	7320.35	9107.38	9016.6	8496.2	8353.33	1.09109	0.374861
XM_022821797.1	34718265 [Gene Symbol: PDX1] [Locus Tag: KLMA_80065] [Chromosome: 8] [Map Location: ] [Description: pyruvate dehydrogenase complex protein X component] [Gene Type: protein-coding]	89.939	82.7833	52.9107	29.3384	30.1325	31.7614	0.404339	0.0587156
XM_022820285.1	34714008 [Gene Symbol: PFK1] [Locus Tag: KLMA_10341] [Chromosome: 1] [Map Location: ] [Description: 6-phosphofructokinase subunit alpha] [Gene Type: protein-coding]	293.75	305.12	325.487	112.395	122.309	100.319	0.362439	6.31964e-05
XM_022822209.1	34714197 [Gene Symbol: PGK] [Locus Tag: KLMA_10540] [Chromosome: 1] [Map Location: ] [Description: phosphoglycerate kinase] [Gene Type: protein-coding]	1474.23	1598.29	2022.89	1102.23	1302.03	1004.23	0.66893	0.0579444
XM_022820878.1	34717440 [Gene Symbol: PYK1] [Locus Tag: KLMA_60219] [Chromosome: 6] [Map Location: ] [Description: pyruvate kinase] [Gene Type: protein-coding]	386.111	385.986	481.42	757.64	797.205	593.936	1.7142	0.0235598
XM_022822454.1	34714417 [Gene Symbol: RAG2] [Locus Tag: KLMA_10763] [Chromosome: 1] [Map Location: ] [Description: glucose-6-phosphate isomerase] [Gene Type: protein-coding]	182.503	199.616	192.905	155.303	161.897	144.995	0.803783	0.00579067
XM_022821086.1	34717627 [Gene Symbol: RAG5] [Locus Tag: KLMA_60412] [Chromosome: 6] [Map Location: ] [Description: hexokinase] [Gene Type: protein-coding]	581.873	641.535	761.257	1550.99	1816.91	1480.08	2.44272	0.00369234
XM_022821434.1	34717940 [Gene Symbol: RHR2] [Locus Tag: KLMA_70183] [Chromosome: 7] [Map Location: ] [Description: (DL)-glycerol-3-phosphatase 1] [Gene Type: protein-coding]	731.126	775.319	880.458	1461.33	1661.17	1126.11	1.77997	0.0620695
XM_022818087.1	34714934 [Gene Symbol: SDH1] [Locus Tag: KLMA_20466] [Chromosome: 2] [Map Location: ] [Description: succinate dehydrogenase [ubiquinone] flavoprotein subunit] [Gene Type: protein-coding]	324.011	324.436	305.375	260.441	262.734	295.514	0.858325	0.0401379
XM_022819408.1	34716118 [Gene Symbol: TPI1] [Locus Tag: KLMA_40125] [Chromosome: 4] [Map Location: ] [Description: triosephosphate isomerase] [Gene Type: protein-coding]	621.564	627.788	720.061	1022.8	1143.87	912.835	1.56366	0.0153492
XM_022820635.1	34717221 [Gene Symbol: ZWF] [Locus Tag: KLMA_50631] [Chromosome: 5] [Map Location: ] [Description: glucose-6-phosphate 1-dehydrogenase] [Gene Type: protein-coding]	516.545	528.198	538.537	379.839	341.947	431.043	0.728127	0.0326582
